# Supplementary material for: Pten regulates collagen fibrillogenesis by fibroblasts through SPARC
Source: PubMed Central journal article supplement (PMC7857610; doi:10.1371/journal.pone.0245653), 2021-02-03
Supplement: pone.0245653.s001.pdf [file pone.0245653.s001.pdf]

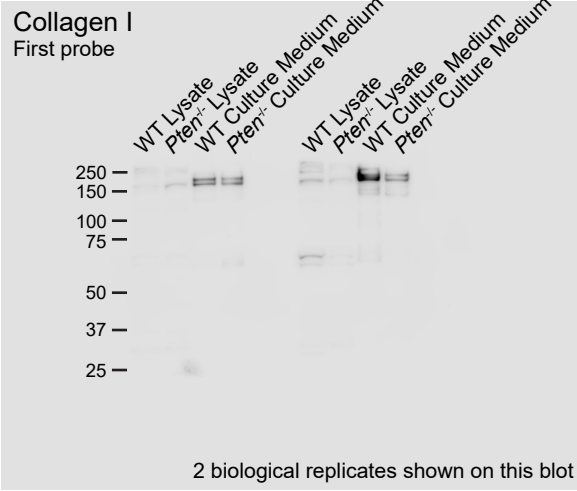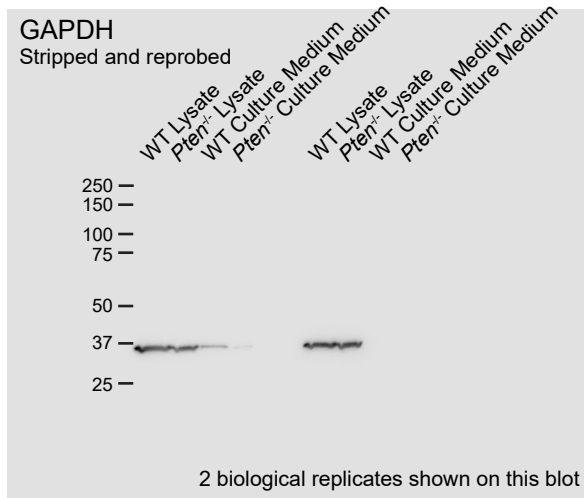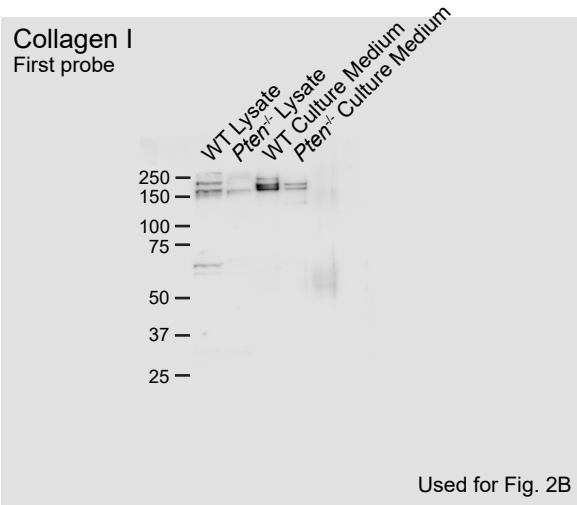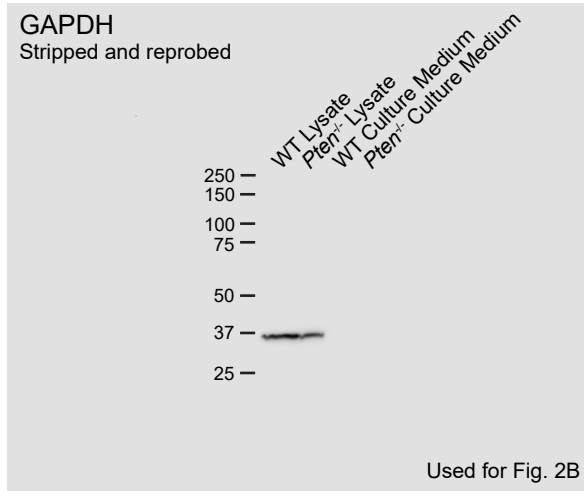

Images captured using LI-COR Odyssey FC imaging system.

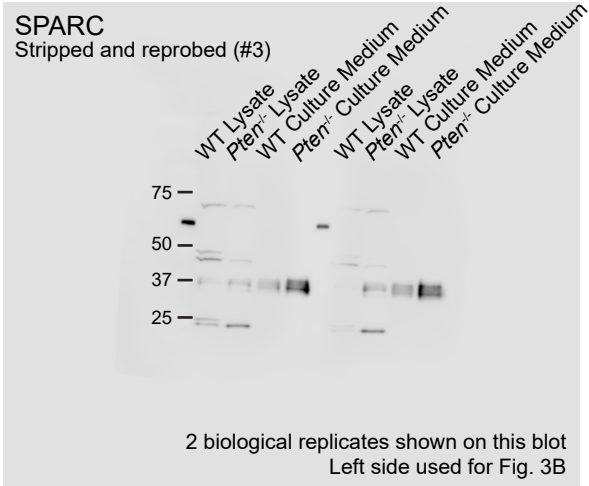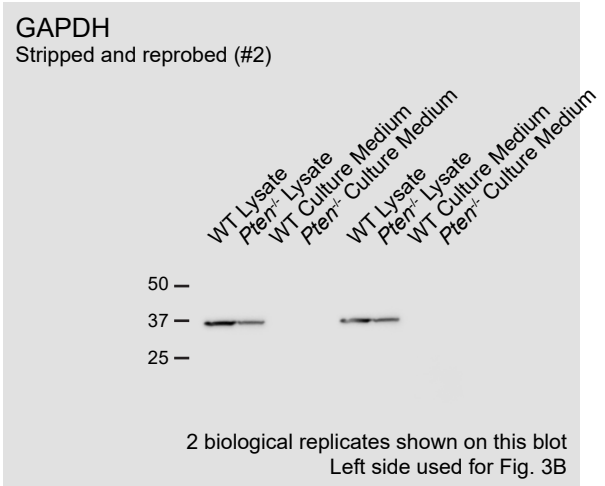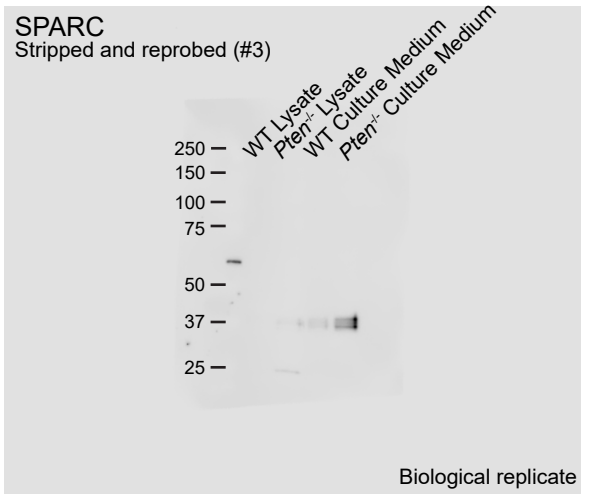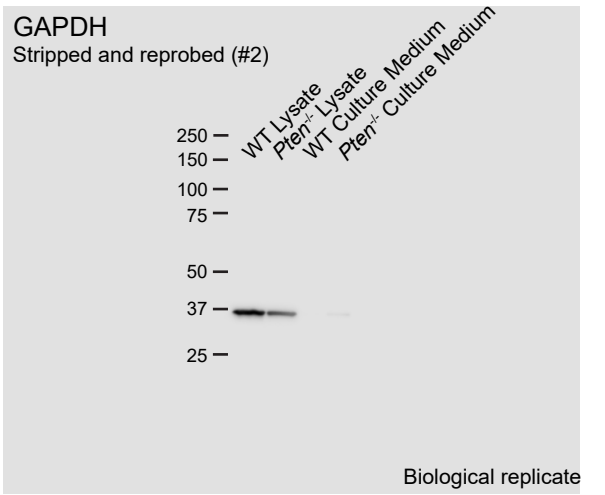

Images captured using LI-COR Odyssey FC imaging system.

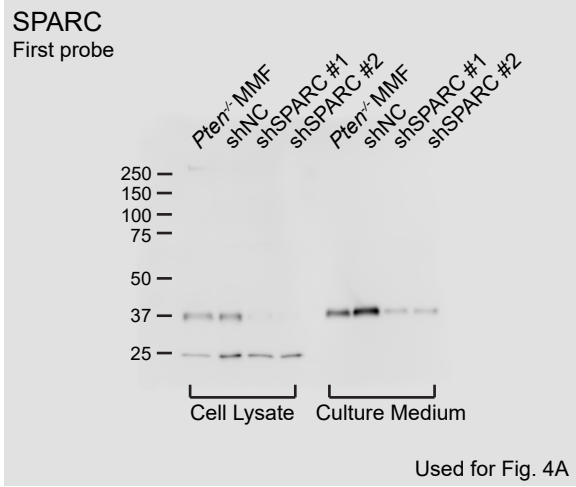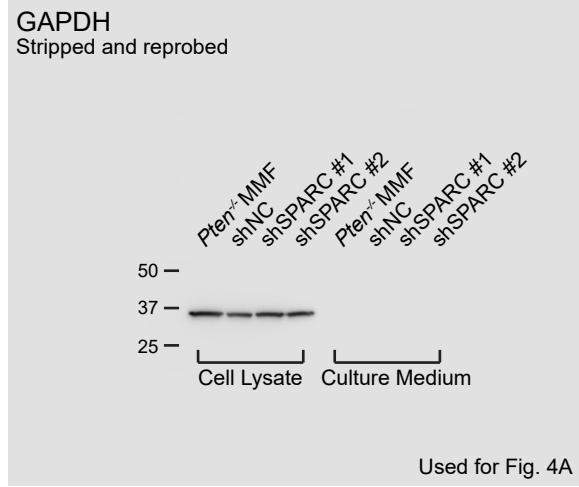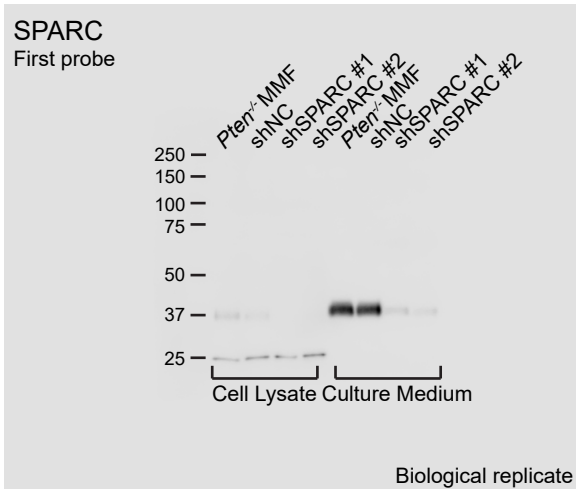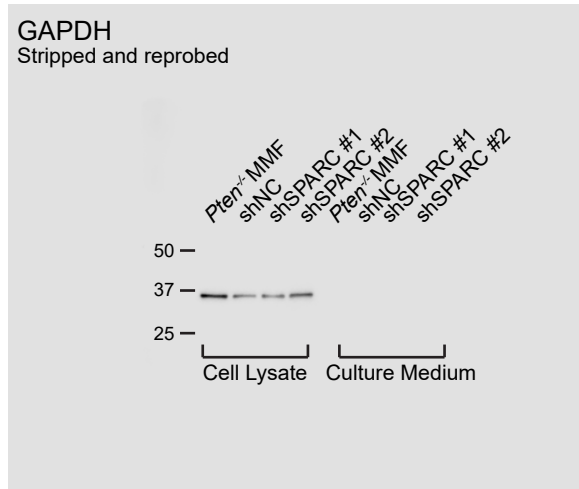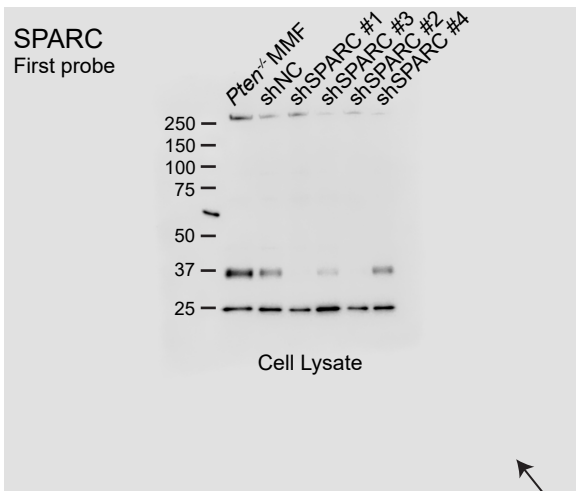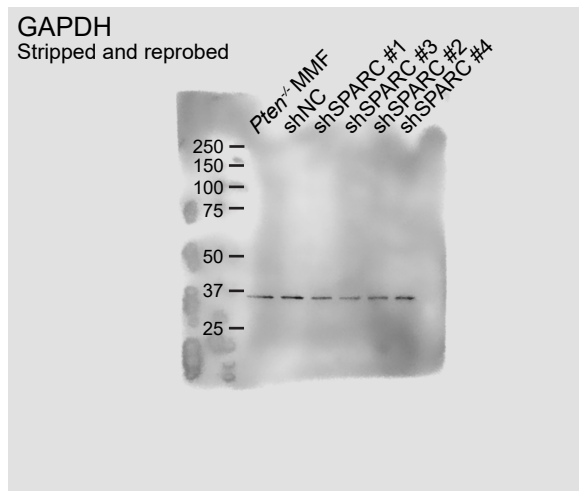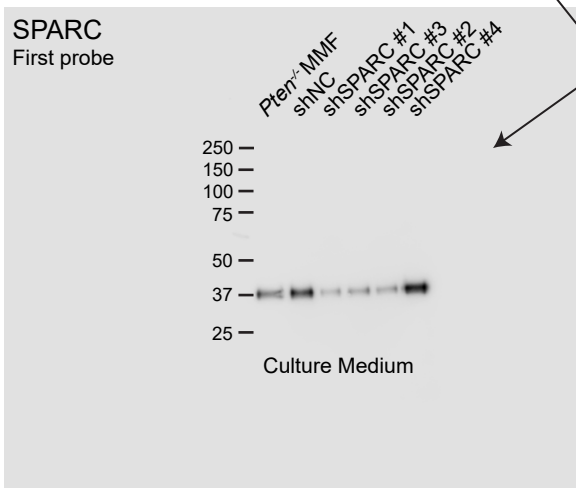

Matching set from same biological replicate

Images captured using LI-COR Odyssey FC imaging system.

**Collagen I**  
First probe

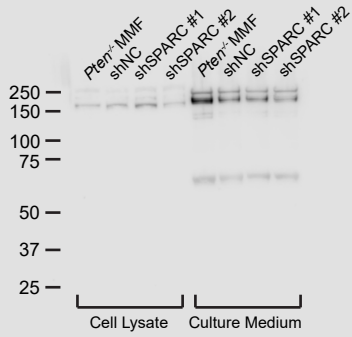

Used for Fig. 4B

**GAPDH**  
Stripped and reprobed

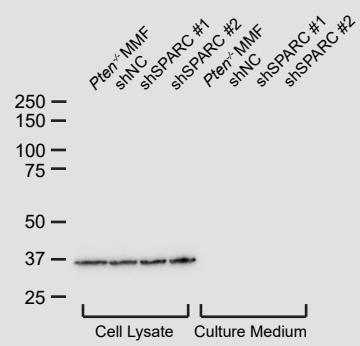

Used for Fig. 4B

**Collagen I**  
First probe

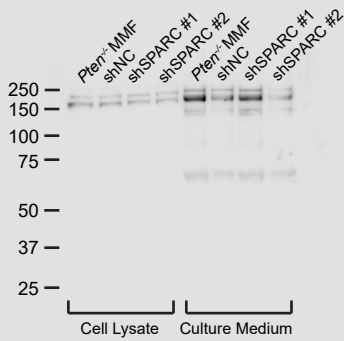

Biological replicate

**GAPDH**  
Stripped and reprobed

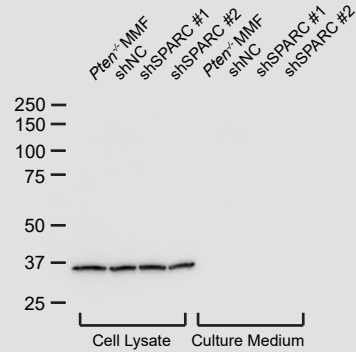

**Collagen I**  
First probe

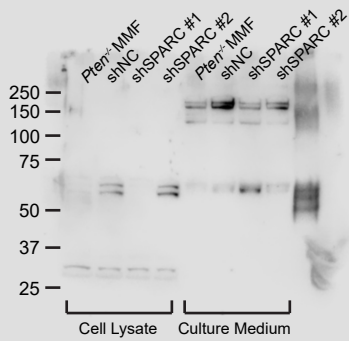

Biological replicate

**GAPDH**  
Stripped and reprobed

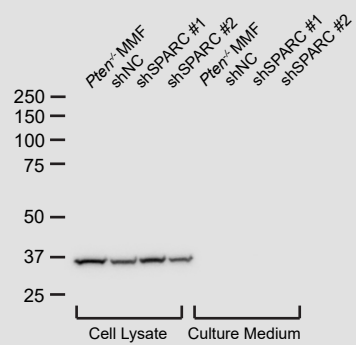

Images captured using LI-COR Odyssey FC imaging system.
